# Supplementary material for: AKT3 deficiency in M2 macrophages impairs cutaneous wound healing by disrupting tissue remodeling
Source: publisher site journal article supplement (doi:10.18632/aging.103051), 2020-04-14
Supplement: Supplementary file [file aging-v12i8-103051-supplementary-material-SD1.pdf]

## SUPPLEMENTARY FIGURES

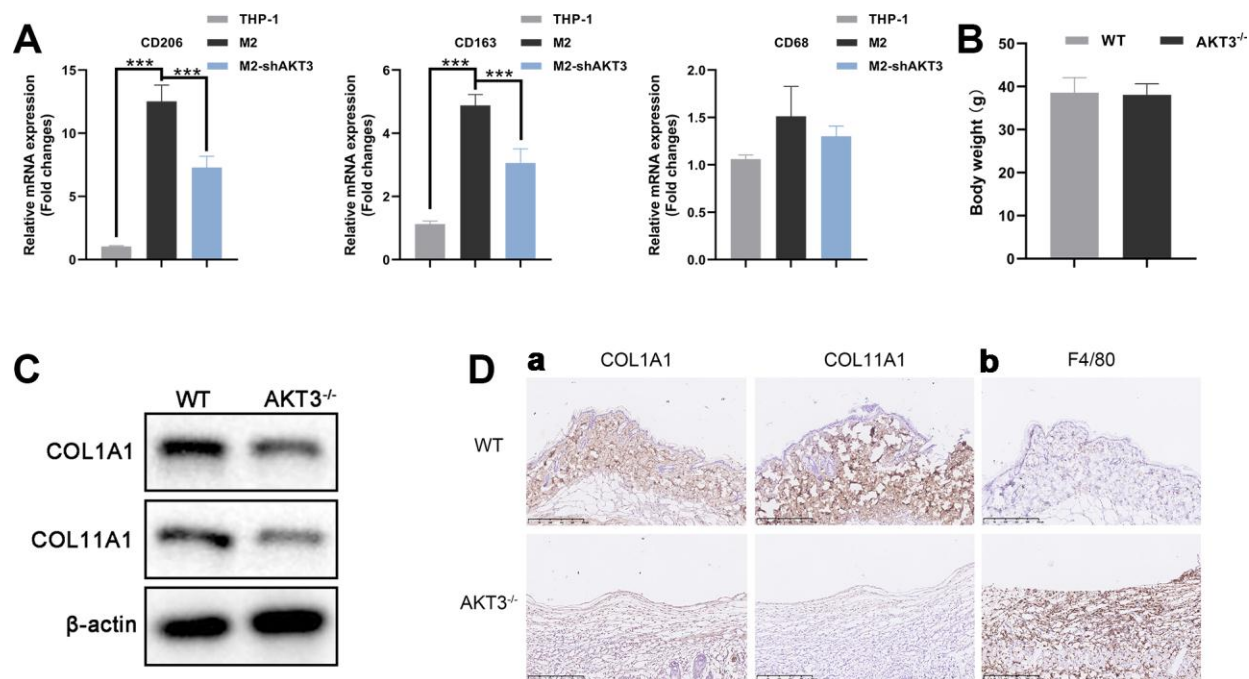

**Supplementary Figure 1.** (A) CD68, CD163, and CD206 mRNA expression levels in THP-1-derived M2 macrophages measured using qRT-PCR. (B) Body weights of AKT3<sup>+/+</sup> and AKT3<sup>-/-</sup> mice. (C) COL1A1 and COL11A1 expression measured using Western blotting in wound tissue of AKT3<sup>+/+</sup> and AKT3<sup>-/-</sup> mice. (D) The level of COL1A1, COL11A1 and F4/80 expression in cutaneous tissue of AKT3<sup>+/+</sup> and AKT3<sup>-/-</sup> mice detected by IHC. All the experiments were repeated at least three times.

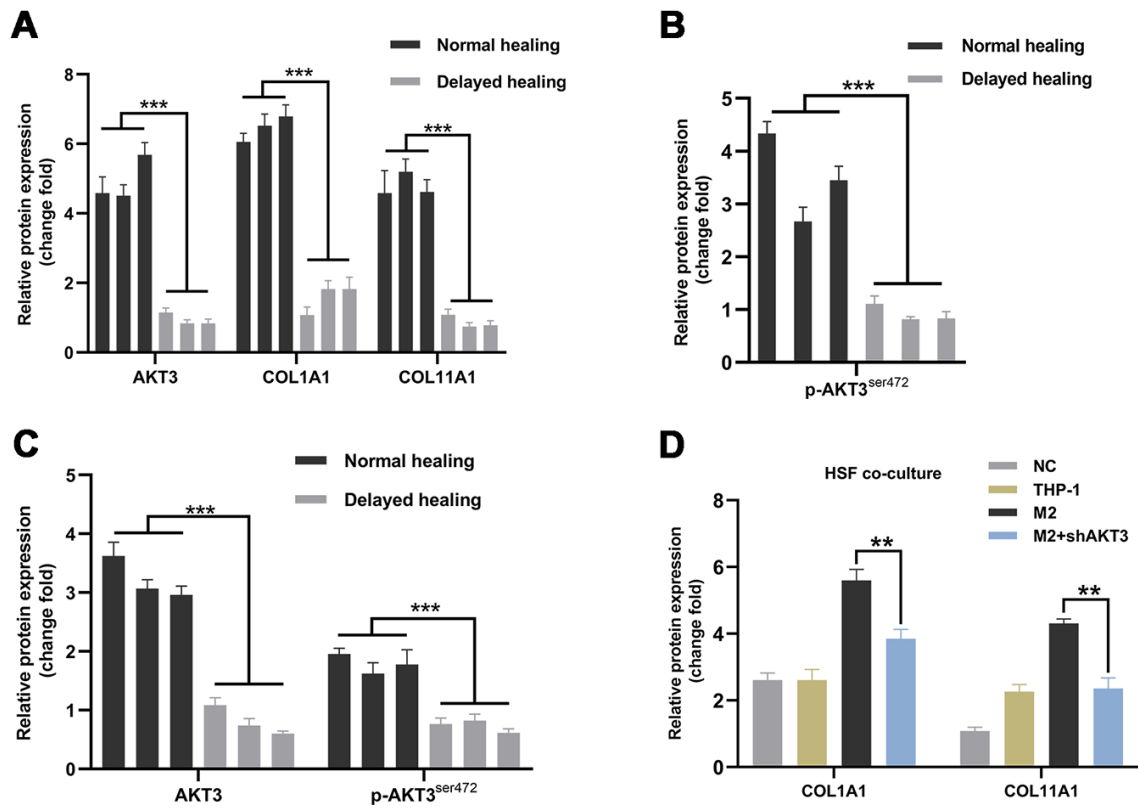

**Supplementary Figure 2.** (A) The quantified data of Figure 3E (n=3). (B) The quantified data of Figure 3F (n=3). (C) The quantified data of Figure 4E (n=3). (D) The quantified data of Figure 5I (n=3). All the experiments were repeated at least three times.
